# Supplementary material
Source: Research Square preprint supplement (doi:10.21203/rs.3.rs-10020860/v1)
Supplement: Supplementary file 1 [file 2c227b33a97857e2e5eb36fa.docx]

Table 2. Prevalence of different types of refractive error among schoolchildren

|  | **Classification** | **N** | **Prevalence** | **IC95%** |
| --- | --- | --- | --- | --- |
| **Total** | Myopia/Astigmatism | 84 | 12.5 | 10.1–15.2 |
| Myopia | 38 | 5.7 | 4.0–7.7 |
| Hyperopia | 39 | 5.8 | 4.2–7.8 |
| Hyperopia/Astigmatism | 36 | 5.4 | 3.8–7.3 |
| **Sex** |  |  |  |  |
| Female | Astigmatism | 76 | 21.1 | 17.0–25.6 |
| Myopia/Astigmatism | 43 | 11.9 | 8.8–15.7 |
| Myopia | 26 | 7.2 | 4.8–10.4 |
| Hyperopia | 18 | 5.0 | 3.0–7.8 |
| Hyperopia/Astigmatism | 20 | 5.5 | 3.4–8.4 |
| Male | Astigmatism | 57 | 18.3 | 14.2–23.1 |
| Myopia/Astigmatism | 41 | 13.2 | 9.6–17.5 |
| Myopia | 12 | 3.9 | 2.0–6.6 |
| Hyperopia | 21 | 6.8 | 4.2–10.1 |
| Hyperopia/Astigmatism | 16 | 5.1 | 3.0–8.2 |
| **Uses glasses** |  |  |  |  |
| No | Astigmatism | 112 | 20.6 | 17.3–24.2 |
| Myopia/Astigmatism | 25 | 4.5 | 2.9–6.6 |
| Myopia | 22 | 4.0 | 2.5–6.0 |
| Hyperopia | 38 | 6.9 | 4.9–9.3 |
| Hyperopia/Astigmatism | 21 | 3.8 | 2.4–5.7 |
| Yes | Astigmatism | 19 | 16.1 | 10.0–24.0 |
| Myopia/Astigmatism | 59 | 50.0 | 40.7–59.3 |
| Myopia | 16 | 13.6 | 8.0–21.1 |
| Hyperopia | 1 | 0.8 | 0.0–4.6 |
| Hyperopia/Astigmatism | 15 | 12.7 | 7.3–20.1 |
| **Previous prescription** |  |  |  |  |
| No | Astigmatism | 113 | 20.8 | 17.4–24.4 |
| Myopia/Astigmatism | 25 | 4.6 | 3.0–6.7 |
| Myopia | 21 | 3.9 | 2.4–5.8 |
| Hyperopia | 34 | 6.2 | 4.4–8.6 |
| Hyperopia/Astigmatism | 20 | 3.7 | 2.3–5.6 |
| Yes | Astigmatism | 20 | 15.6 | 9.8–23.1 |
| Myopia/Astigmatism | 59 | 46.1 | 37.2–55.1 |
| Myopia | 17 | 13.3 | 7.9–20.4 |
| Hyperopia | 5 | 3.9 | 1.3–8.9 |
| Hyperopia/Astigmatism | 16 | 12.5 | 7.3–19.5 |
| **Current prescription** |  |  |  |  |
| No | Astigmatism | 71 | 16.6 | 13.2–20.5 |
| Myopia | 2 | 0.5 | 0.1–1.7 |
| Hyperopia | 13 | 3.0 | 1.6–5.1 |
| Myopia/Astigmatism | 1 | 0.2 | 0.0–1.3 |
| Yes | Astigmatism | 62 | 25.4 | 20.1–31.4 |
| Myopia/Astigmatism | 83 | 34.0 | 28.1–40.3 |
| Myopia | 36 | 14.8 | 10.6–19.8 |
| Hyperopia | 26 | 10.7 | 7.1–15.2 |
| Hyperopia/Astigmatism | 36 | 14.8 | 10.6–19.8 |

**Note:** Prevalence was calculated considering the presence of refractive error in the worse eye.
