# Supplementary material
Source: Research Square preprint supplement (doi:10.21203/rs.3.rs-10020860/v1)
Supplement: Supplementary file 2 [file f73e3266d09c32ca1de5a202.docx]

Supplementary Table 1 - Prevalence of refractive error and respective 95% confidence intervals according to subgroups of the studied population.

| Variable | Category | **N** | **Prevalence (%)** | **IC95%** |
| --- | --- | --- | --- | --- |
| **Total** | — | 672 | 49.1 | 45.3–53.0 |
| **Sex** | Male | 311 | 47.3 | 41.6–53.0 |
| Female | 361 | 50.7 | 45.4–56.0 |
| **Age group** | 6–8 years | 185 | 53 | 45.5–60.3 |
| 9–12 years | 40 | 42.5 | 27.0–59.1 |
| 13–16 years | 174 | 44.8 | 37.3–52.5 |
| **Family income** | Less than 1 minimum wage | 59 | 50.8 | 37.5–64.1 |
| 1–3 minimum wages | 412 | 51.2 | 46.3–56.1 |
| 3–5 minimum wages | 167 | 46.1 | 38.4–54.0 |
| More than 5 minimum wages | 34 | 35.3 | 19.7–53.5 |
| **Maternal education** | Primary education | 118 | 48.3 | 39.0–57.7 |
| Secondary education | 367 | 47.4 | 42.2–52.7 |
| Higher education | 181 | 52.5 | 44.9–59.9 |
| **Outdoor activity** | Less than 1 hour/day | 154 | 47.4 | 39.3–55.6 |
| 1–2 hours/day | 331 | 51.1 | 45.5–56.6 |
| 3–4 hours/day | 141 | 48.2 | 39.7–56.8 |
| More than 4 hours/day | 46 | 43.5 | 28.9–58.9 |
| **Screen time** | Less than 1 hour/day | 43 | 58.1 | 42.1–73.0 |
| 1–2 hours/day | 259 | 49.8 | 43.6–56.1 |
| 3–4 hours/day | 225 | 46.2 | 39.6–53.0 |
| 4 hours or more/day | 145 | 49.7 | 41.3–58.1 |
| **Family history of spectacle use** | No | 49 | 30.6 | 20.8–47.9 |
| Yes | 623 | 50.6 | 46.4–54.4 |

**Note:** Prevalence was calculated considering the presence of refractive error in the worse eye.
